# Supplementary material for: Lack of transmission of Sugarcane yellow leaf virus in Florida from Columbus grass and sugarcane to sugarcane with aphids or mites
Source: PLoS One. 2020 Mar 6;15(3):e0230066. doi: 10.1371/journal.pone.0230066 (PMC7059971; doi:10.1371/journal.pone.0230066)
Supplement: S1 Table — (XLSX) [file pone.0230066.s001.xlsx]

## Sheet: Feuil1
S1 Table. Characteristics of Melanaphis sacchari samples collected in the Everglades Agricultural Area for determination of aphid haplotypes
Sample number	Sample code	Sampling locationa	Host plant	Host plant common name	Sampling date	Collected by	Aphid haplotypeb
1	LT#17	Belle Glade (EREC-UF)	Saccharum spp.	sugarcane var. CP96-1252	21 November 2016	W. Boukari	H3
2	LT#31	Belle Glade (EREC-UF)	Saccharum spp.	sugarcane var. CP96-1252	14 April 2018	W. Boukari-L. Tang	H3
3	LT#32	Belle Glade (EREC-UF)	Saccharum spp.	sugarcane var. CP96-1252	14 April 2018	W. Boukari-L. Tang	H3
4	LT#33	Belle Glade (EREC-UF)	Saccharum spp.	sugarcane var. CP96-1252	16 April 2018	W. Boukari-L. Tang	H3
5	LT#46	Belle Glade (EREC-UF)	Saccharum spp.	sugarcane var. CP96-1252	21 April 2018	W. Boukari-L. Tang	H3
6	0321-1	Clewiston-Townsite (US Sugar)	Saccharum spp.	sugarcane var. 1	1 April 2019	C. Kaye-S. Leahy-P. Rott	H3
7	0321-2	Clewiston-Townsite (US Sugar)	Saccharum spp.	sugarcane var. 1	1 April 2019	C. Kaye-S. Leahy-P. Rott	H1
8	1296-1	Clewiston-Townsite (US Sugar)	Saccharum spp.	sugarcane var. 2	1 April 2019	C. Kaye-S. Leahy-P. Rott	H3
9	1296-2	Clewiston-Townsite (US Sugar)	Saccharum spp.	sugarcane var. 2	1 April 2019	C. Kaye-S. Leahy-P. Rott	H3
10	1743-1	Clewiston-Townsite (US Sugar)	Saccharum spp.	sugarcane var. 3	1 April 2019	C. Kaye-S. Leahy-P. Rott	H3
11	1984-1	Clewiston-Townsite (US Sugar)	Saccharum spp.	sugarcane var. 4	1 April 2019	C. Kaye-S. Leahy-P. Rott	H2
12	1984-2	Clewiston-Townsite (US Sugar)	Saccharum spp.	sugarcane var. 4	1 April 2019	C. Kaye-S. Leahy-P. Rott	H2
13	4266-1	Clewiston-Townsite (US Sugar)	Saccharum spp.	sugarcane var. 5	1 April 2019	C. Kaye-S. Leahy-P. Rott	H3
14	4266-2	Clewiston-Townsite (US Sugar)	Saccharum spp.	sugarcane var. 5	1 April 2019	C. Kaye-S. Leahy-P. Rott	H3
15	2730-1	Clewiston-Townsite (US Sugar)	Saccharum spp.	sugarcane var. 6	1 April 2019	C. Kaye-S. Leahy-P. Rott	H3
16	2730-2	Clewiston-Townsite (US Sugar)	Saccharum spp.	sugarcane var. 6	1 April 2019	C. Kaye-S. Leahy-P. Rott	H3
17	2460-1	Clewiston-Townsite (US Sugar)	Saccharum spp.	sugarcane var. 7	1 April 2019	C. Kaye-S. Leahy-P. Rott	H3
18	2460-2	Clewiston-Townsite (US Sugar)	Saccharum spp.	sugarcane var. 7	1 April 2019	C. Kaye-S. Leahy-P. Rott	H3
19	1570-1	Clewiston-Townsite (US Sugar)	Saccharum spp.	sugarcane var. 8	1 April 2019	C. Kaye-S. Leahy-P. Rott	H3
20	3657-1	Clewiston-Townsite (US Sugar)	Saccharum spp.	sugarcane var. 9	1 April 2019	C. Kaye-S. Leahy-P. Rott	H3
21	3657-2	Clewiston-Townsite (US Sugar)	Saccharum spp.	sugarcane var. 9	1 April 2019	C. Kaye-S. Leahy-P. Rott	H3
22	1989-1	Clewiston-Townsite (US Sugar)	Saccharum spp.	sugarcane var. 10	1 April 2019	C. Kaye-S. Leahy-P. Rott	H2
23	1989-2	Clewiston-Townsite (US Sugar)	Saccharum spp.	sugarcane var. 10	1 April 2019	C. Kaye-S. Leahy-P. Rott	H2
24	5254-1	Clewiston-Townsite (US Sugar)	Saccharum spp.	sugarcane var. 11	1 April 2019	C. Kaye-S. Leahy-P. Rott	H3
25	5254-2	Clewiston-Townsite (US Sugar)	Saccharum spp.	sugarcane var. 11	1 April 2019	C. Kaye-S. Leahy-P. Rott	H3
26	4272-1	Clewiston-Townsite (US Sugar)	Saccharum spp.	sugarcane var. 12	1 April 2019	C. Kaye-S. Leahy-P. Rott	H3
27	4272-2	Clewiston-Townsite (US Sugar)	Saccharum spp.	sugarcane var. 12	1 April 2019	C. Kaye-S. Leahy-P. Rott	H3
28	4875-1	Clewiston-Townsite (US Sugar)	Saccharum spp.	sugarcane var. 13	1 April 2019	C. Kaye-S. Leahy-P. Rott	H3
29	4875-2	Clewiston-Townsite (US Sugar)	Saccharum spp.	sugarcane var. 13	1 April 2019	C. Kaye-S. Leahy-P. Rott	H3
30	4325-1	Clewiston-Townsite (US Sugar)	Saccharum spp.	sugarcane var. CL87-4325	1 April 2019	C. Kaye-S. Leahy-P. Rott	H3
31	4325-2	Clewiston-Townsite (US Sugar)	Saccharum spp.	sugarcane var. CL87-4325	1 April 2019	C. Kaye-S. Leahy-P. Rott	H3
32	3279-1	Clewiston-Townsite (US Sugar)	Saccharum spp.	sugarcane var. CL86-3279	1 April 2019	C. Kaye-S. Leahy-P. Rott	H3
33	3279-2	Clewiston-Townsite (US Sugar)	Saccharum spp.	sugarcane var. CL86-3279	1 April 2019	C. Kaye-S. Leahy-P. Rott	H3
34	1294-1	Clewiston-Townsite (US Sugar)	Saccharum spp.	sugarcane var. CL66-1294	1 April 2019	C. Kaye-S. Leahy-P. Rott	H3
35	1294-2	Clewiston-Townsite (US Sugar)	Saccharum spp.	sugarcane var. CL66-1294	1 April 2019	C. Kaye-S. Leahy-P. Rott	H2
36	0561-1	Clewiston-Townsite (US Sugar)	Saccharum spp.	sugarcane var. CL77-0561	1 April 2019	C. Kaye-S. Leahy-P. Rott	H3
37	0561-2	Clewiston-Townsite (US Sugar)	Saccharum spp.	sugarcane var. CL77-0561	1 April 2019	C. Kaye-S. Leahy-P. Rott	H3
38	0549-1	Clewiston-Townsite (US Sugar)	Saccharum spp.	sugarcane var. CL94-0549	1 April 2019	C. Kaye-S. Leahy-P. Rott	H2
39	1570-1	Clewiston-Townsite (US Sugar)	Saccharum spp.	sugarcane var. CL92-1570	1 April 2019	C. Kaye-S. Leahy-P. Rott	H3
40	1570-2	Clewiston-Townsite (US Sugar)	Saccharum spp.	sugarcane var. CL92-1570	1 April 2019	C. Kaye-S. Leahy-P. Rott	H3
41	1255-1	Clewiston-Townsite (US Sugar)	Saccharum spp.	sugarcane var. CP12-1255	1 April 2019	C. Kaye-S. Leahy-P. Rott	H3
42	1255-2	Clewiston-Townsite (US Sugar)	Saccharum spp.	sugarcane var. CP12-1255	1 April 2019	C. Kaye-S. Leahy-P. Rott	H3
43	2651-1	Clewiston-Townsite (US Sugar)	Saccharum spp.	sugarcane var. CL85-2651	1 April 2019	C. Kaye-S. Leahy-P. Rott	H3
44	111-1	Clewiston-Townsite (US Sugar)	Saccharum spp.	sugarcane var. CL85-1111	1 April 2019	C. Kaye-S. Leahy-P. Rott	H3
45	0517-1	Clewiston-Townsite (US Sugar)	Saccharum spp.	sugarcane var. CL72-0517	1 April 2019	C. Kaye-S. Leahy-P. Rott	H3
46	0517-2	Clewiston-Townsite (US Sugar)	Saccharum spp.	sugarcane var. CL72-0517	1 April 2019	C. Kaye-S. Leahy-P. Rott	H3
47	0356-1	Clewiston-Townsite (US Sugar)	Saccharum spp.	sugarcane var. CL65-0356	1 April 2019	C. Kaye-S. Leahy-P. Rott	H3
48	0356-2	Clewiston-Townsite (US Sugar)	Saccharum spp.	sugarcane var. CL65-0356	1 April 2019	C. Kaye-S. Leahy-P. Rott	H3
49	1167-1	Clewiston-Townsite (US Sugar)	Saccharum spp.	sugarcane var. CL59-1167	1 April 2019	C. Kaye-S. Leahy-P. Rott	H3
50	1167-2	Clewiston-Townsite (US Sugar)	Saccharum spp.	sugarcane var. CL59-1167	1 April 2019	C. Kaye-S. Leahy-P. Rott	H3
51	1595-1	Clewiston-Townsite (US Sugar)	Saccharum spp.	sugarcane var. CL90-1595	1 April 2019	C. Kaye-S. Leahy-P. Rott	H3
52	1595-2	Clewiston-Townsite (US Sugar)	Saccharum spp.	sugarcane var. CL90-1595	1 April 2019	C. Kaye-S. Leahy-P. Rott	H3
53	1252-TS1-1	Clewiston-Townsite (US Sugar)	Saccharum spp.	sugarcane var. CP96-1252	1 April 2019	C. Kaye-S. Leahy-P. Rott	H3
54	1252-TS1-2	Clewiston-Townsite (US Sugar)	Saccharum spp.	sugarcane var. CP96-1252	1 April 2019	C. Kaye-S. Leahy-P. Rott	H3
55	1252-TS2-1	Clewiston-Townsite (US Sugar)	Saccharum spp.	sugarcane var. CP96-1252	1 April 2019	C. Kaye-S. Leahy-P. Rott	H2
56	H1252-B1-1	Okeelanta (Florida Crystals)	Saccharum spp.	sugarcane var. CP96-1252	27 March 2019	P. Rott	H3
57	H1252-B1-2	Okeelanta (Florida Crystals)	Saccharum spp.	sugarcane var. CP96-1252	27 March 2019	P. Rott	H3
58	H1252-B2-1	Okeelanta (Florida Crystals)	Saccharum spp.	sugarcane var. CP96-1252	27 March 2019	P. Rott	H3
59	H1252-B2-2	Okeelanta (Florida Crystals)	Saccharum spp.	sugarcane var. CP96-1252	27 March 2019	P. Rott	H3
60	H1252-B3-1	Okeelanta (Florida Crystals)	Saccharum spp.	sugarcane var. CP96-1252	27 March 2019	P. Rott	H3
61	H1252-B3-2	Okeelanta (Florida Crystals)	Saccharum spp.	sugarcane var. CP96-1252	27 March 2019	P. Rott	H3
62	I1252-B1-1	Okeelanta (Florida Crystals)	Saccharum spp.	sugarcane var. CP96-1252	27 March 2019	P. Rott	H3
63	I1252-B1-2	Okeelanta (Florida Crystals)	Saccharum spp.	sugarcane var. CP96-1252	27 March 2019	P. Rott	H3
64	I1252-B2-1	Okeelanta (Florida Crystals)	Saccharum spp.	sugarcane var. CP96-1252	27 March 2019	P. Rott	H2
65	I1252-B2-2	Okeelanta (Florida Crystals)	Saccharum spp.	sugarcane var. CP96-1252	27 March 2019	P. Rott	H3
66	I1252-B3-1	Okeelanta (Florida Crystals)	Saccharum spp.	sugarcane var. CP96-1252	27 March 2019	P. Rott	H3
67	I1252-B3-2	Okeelanta (Florida Crystals)	Saccharum spp.	sugarcane var. CP96-1252	27 March 2019	P. Rott	H3
68	H1372-B1-1	Okeelanta (Florida Crystals)	Saccharum spp.	sugarcane var. CP01-1372	27 March 2019	P. Rott	H3
69	H1372-B1-2	Okeelanta (Florida Crystals)	Saccharum spp.	sugarcane var. CP01-1372	27 March 2019	P. Rott	H3
70	H1372-B2-1	Okeelanta (Florida Crystals)	Saccharum spp.	sugarcane var. CP01-1372	27 March 2019	P. Rott	H3
71	H1372-B2-2	Okeelanta (Florida Crystals)	Saccharum spp.	sugarcane var. CP01-1372	27 March 2019	P. Rott	H3
72	H1372-B3-1	Okeelanta (Florida Crystals)	Saccharum spp.	sugarcane var. CP01-1372	27 March 2019	P. Rott	H3
73	H1372-B3-2	Okeelanta (Florida Crystals)	Saccharum spp.	sugarcane var. CP01-1372	27 March 2019	P. Rott	H3
74	I1372-B1-2	Okeelanta (Florida Crystals)	Saccharum spp.	sugarcane var. CP01-1372	27 March 2019	P. Rott	H3
75	I1372-B2-1	Okeelanta (Florida Crystals)	Saccharum spp.	sugarcane var. CP01-1372	27 March 2019	P. Rott	H3
76	I1372-B2-2	Okeelanta (Florida Crystals)	Saccharum spp.	sugarcane var. CP01-1372	27 March 2019	P. Rott	H3
77	I1372-B3-1	Okeelanta (Florida Crystals)	Saccharum spp.	sugarcane var. CP01-1372	27 March 2019	P. Rott	H3
78	I1372-B3-2	Okeelanta (Florida Crystals)	Saccharum spp.	sugarcane var. CP01-1372	27 March 2019	P. Rott	H3
79	SC Aphid	Okeelanta (Florida Crystals)	Saccharum spp.	sugarcane var. CP96-1252	19 November 2018	P. Rott	H3
80	LT#3	Canal Point	Sorghum almum	Columbus grass	1 December 2015	C. Wei	H1
81	LT#4	Belle Glade (EREC-UF)	Sorghum almum	Columbus grass	11 December 2015	C. Wei	H1
82	LT#8	Clewiston-Townsite (US Sugar)	Sorghum almum	Columbus grass	25 October 2016	W. Boukari-P. Rott	H1
83	LT#9	Clewiston-Townsite (US Sugar)	Sorghum almum	Columbus grass	25 October 2016	W. Boukari-P. Rott	H1
84	LT#10	Clewiston-Townsite (US Sugar)	Sorghum almum	Columbus grass	25 October 2016	W. Boukari-P. Rott	H1
85	LT#11	Clewiston-Townsite (US Sugar)	Sorghum almum	Columbus grass	25 October 2016	W. Boukari-P. Rott	H1
86	LT#12	Clewiston-Townsite (US Sugar)	Sorghum almum	Columbus grass	25 October 2016	W. Boukari-P. Rott	H1
87	LT#13	Clewiston-Townsite (US Sugar)	Sorghum almum	Columbus grass	25 October 2016	W. Boukari-P. Rott	H1
88	LT#14	Clewiston-Townsite (US Sugar)	Sorghum almum	Columbus grass	25 October 2016	W. Boukari-P. Rott	H1
89	LT#15	Clewiston-Townsite (US Sugar)	Sorghum almum	Columbus grass	7 November 2016	W. Boukari-P. Rott	H1
90	LT#16	Clewiston-Evercane Road	Sorghum almum	Columbus grass	7 November 2016	W. Boukari-P. Rott	H1
91	LT#18	Twentymile Bend	Sorghum almum	Columbus grass	23 August 2017	W. Boukari-P. Rott	H1
92	LT#19	Belle Glade (EREC-UF)	Sorghum almum	Columbus grass	3 December 2015	C. Wei	H1
93	LT#20	Clewiston-No dumping site	Sorghum almum	Columbus grass	7 November 2016	W. Boukari-P. Rott	H1
94	LT#21	Clewiston-US 27 Highway	Sorghum almum	Columbus grass	7 November 2016	W. Boukari-P. Rott	H1
95	LT#22	Clewiston-Evercane Road	Sorghum almum	Columbus grass	7 November 2016	W. Boukari-P. Rott	H1
96	LT#23	Clewiston-Evercane Road	Sorghum almum	Columbus grass	7 November 2016	W. Boukari-P. Rott	H1
97	LT#25	Belle Glade (EREC-UF)	Sorghum almum	Columbus grass	7 November 2016	W. Boukari-P. Rott	H1
98	LT#26	Belle Glade (EREC-UF)	Sorghum almum	Columbus grass	7 November 2016	W. Boukari-P. Rott	H1
99	LT#27	Clewiston-Evercane Road	Sorghum almum	Columbus grass	7 November 2016	W. Boukari-P. Rott	H1
100	LT#29	Lake Harbor-John Stretch Park	Sorghum almum	Columbus grass	2 October 2018	P. Rott-L. Tang	H1
101	LT#30	Lake Harbor-John Stretch Park	Sorghum almum	Columbus grass	2 October 2018	P. Rott-L. Tang	H1
102	LT#T2	Belle Glade (EREC-UF)	Sorghum almum	Columbus grass	3 July 2018	L. Tang	H1
103	LT#T4	Belle Glade (EREC-UF)	Sorghum almum	Columbus grass	3 July 2018	L. Tang	H1
104	LT#T6	Belle Glade (EREC-UF)	Sorghum almum	Columbus grass	3 July 2018	L. Tang	H1
105	LT#T13	Belle Glade (EREC-UF)	Sorghum almum	Columbus grass	2 July 2018	L. Tang	H1
106	LT#T14	Belle Glade (EREC-UF)	Sorghum almum	Columbus grass	2 July 2018	L. Tang	H1
107	LT#T19	Lake Harbor-John Stretch Park	Sorghum almum	Columbus grass	3 July 2018	P. Rott-L. Tang	H1
108	LT#T20	Lake Harbor-John Stretch Park	Sorghum almum	Columbus grass	3 July 2018	P. Rott-L. Tang	H1
109	LT#T21	Lake Harbor-John Stretch Park	Sorghum almum	Columbus grass	3 July 2018	P. Rott-L. Tang	H1
110	LT#T22	Lake Harbor-John Stretch Park	Sorghum almum	Columbus grass	3 July 2018	P. Rott-L. Tang	H1
111	SA-TS1-1	Clewiston-Townsite (US Sugar)	Sorghum almum	Columbus grass	1 April 2019	C. Kaye-S. Leahy-P. Rott	H1
112	SA-TS1-2	Clewiston-Townsite (US Sugar)	Sorghum almum	Columbus grass	1 April 2019	C. Kaye-S. Leahy-P. Rott	H1
113	SA-TS2-1	Clewiston-Townsite (US Sugar)	Sorghum almum	Columbus grass	1 April 2019	C. Kaye-S. Leahy-P. Rott	H1
114	SA-TS2-2	Clewiston-Townsite (US Sugar)	Sorghum almum	Columbus grass	1 April 2019	C. Kaye-S. Leahy-P. Rott	H1
115	SA-TS3-1	Clewiston-Townsite (US Sugar)	Sorghum almum	Columbus grass	1 April 2019	C. Kaye-S. Leahy-P. Rott	H1
116	SA-TS3-2	Clewiston-Townsite (US Sugar)	Sorghum almum	Columbus grass	1 April 2019	C. Kaye-S. Leahy-P. Rott	H1
117	OKE-SAL1-1	Okeelanta (Florida Crystals)	Sorghum almum	Columbus grass	27 March 2019	P. Rott	H1
118	OKE-SAL1-2	Okeelanta (Florida Crystals)	Sorghum almum	Columbus grass	27 March 2019	P. Rott	H1
119	OKE-SAL2-1	Okeelanta (Florida Crystals)	Sorghum almum	Columbus grass	27 March 2019	P. Rott	H1
120	OKE-SAL2-2	Okeelanta (Florida Crystals)	Sorghum almum	Columbus grass	27 March 2019	P. Rott	H1
121	OKE-SAL3-1	Okeelanta (Florida Crystals)	Sorghum almum	Columbus grass	27 March 2019	P. Rott	H1
122	OKE-SAL3-2	Okeelanta (Florida Crystals)	Sorghum almum	Columbus grass	27 March 2019	P. Rott	H1
123	OKE-SAL4-1	Okeelanta (Florida Crystals)	Sorghum almum	Columbus grass	27 March 2019	P. Rott	H1
124	OKE-SAL4-2	Okeelanta (Florida Crystals)	Sorghum almum	Columbus grass	27 March 2019	P. Rott	H1
125	Binks	Wellington (Binks Pointe)	Sorghum almum	Columbus grass	27 April 2019	P. Rott	H1
126	LT#1	Belle Glade (EREC-UF)	Sorghum bicolor	sorghum var. REV RV9782	1 December 2015	C. Wei	H1
127	LT#2	Belle Glade (EREC-UF)	Sorghum bicolor	sorghum var. REV RV9782	1 December 2015	C. Wei	H1
128	LT#5	Belle Glade (EREC-UF)	Sorghum bicolor	sorghum var. REV RV9782	1 December 2015	C. Wei	H1
129	LT#6	Belle Glade (EREC-UF)	Sorghum bicolor	sorghum var. REV RV9782	1 December 2015	C. Wei	H1
130	LT#7	Belle Glade (EREC-UF)	Sorghum bicolor	sorghum var. PI534133	13 July 2016	W. Boukari	H1
131	LT#36	Belle Glade (EREC-UF)	Sorghum bicolor	sorghum var. PI534133	19 April 2018	W. Boukari-L. Tang	H1
132	LT#37	Belle Glade (EREC-UF)	Sorghum bicolor	sorghum var. PI534138	19 April 2018	W. Boukari-L. Tang	H1
133	LT#38	Belle Glade (EREC-UF)	Sorghum bicolor	sorghum var. PI533834	19 April 2018	W. Boukari-L. Tang	H1
134	LT#39	Belle Glade (EREC-UF)	Sorghum bicolor	sorghum var. PI330272	19 April 2018	W. Boukari-L. Tang	H1
135	LT#40	Belle Glade (EREC-UF)	Sorghum bicolor	sorghum var. PI565121	19 April 2018	W. Boukari-L. Tang	H1
136	LT#41	Belle Glade (EREC-UF)	Sorghum bicolor	sorghum var. PI563295	19 April 2018	W. Boukari-L. Tang	H1
137	LT#42	Belle Glade (EREC-UF)	Sorghum bicolor	sorghum var. Keller	19 April 2018	W. Boukari-L. Tang	H1
138	LT#43	Belle Glade (EREC-UF)	Sorghum bicolor	sorghum var. PI563092	19 April 2018	W. Boukari-L. Tang	H1
139	LT#44	Belle Glade (EREC-UF)	Sorghum bicolor	sorghum var. Dale	19 April 2018	W. Boukari-L. Tang	H1
140	LT#45	Belle Glade (EREC-UF)	Sorghum bicolor	sorghum var. PI157033	19 April 2018	W. Boukari-L. Tang	H1
aEREC-UF = Everglades Research and Education Center-University of Florida
bAs described by Nibouche et al. 2018 (PLoS ONE 13(4): e0196124)
